# Supplementary figures and images for: Evaluation of the Antibacterial Properties of Iron Oxide, Polyethylene Glycol, and Gentamicin Conjugated Nanoparticles against Some Multidrug-Resistant Bacteria
Source: MDPI journal article supplement (doi:10.3390/jfb13030138), 2022-09-02

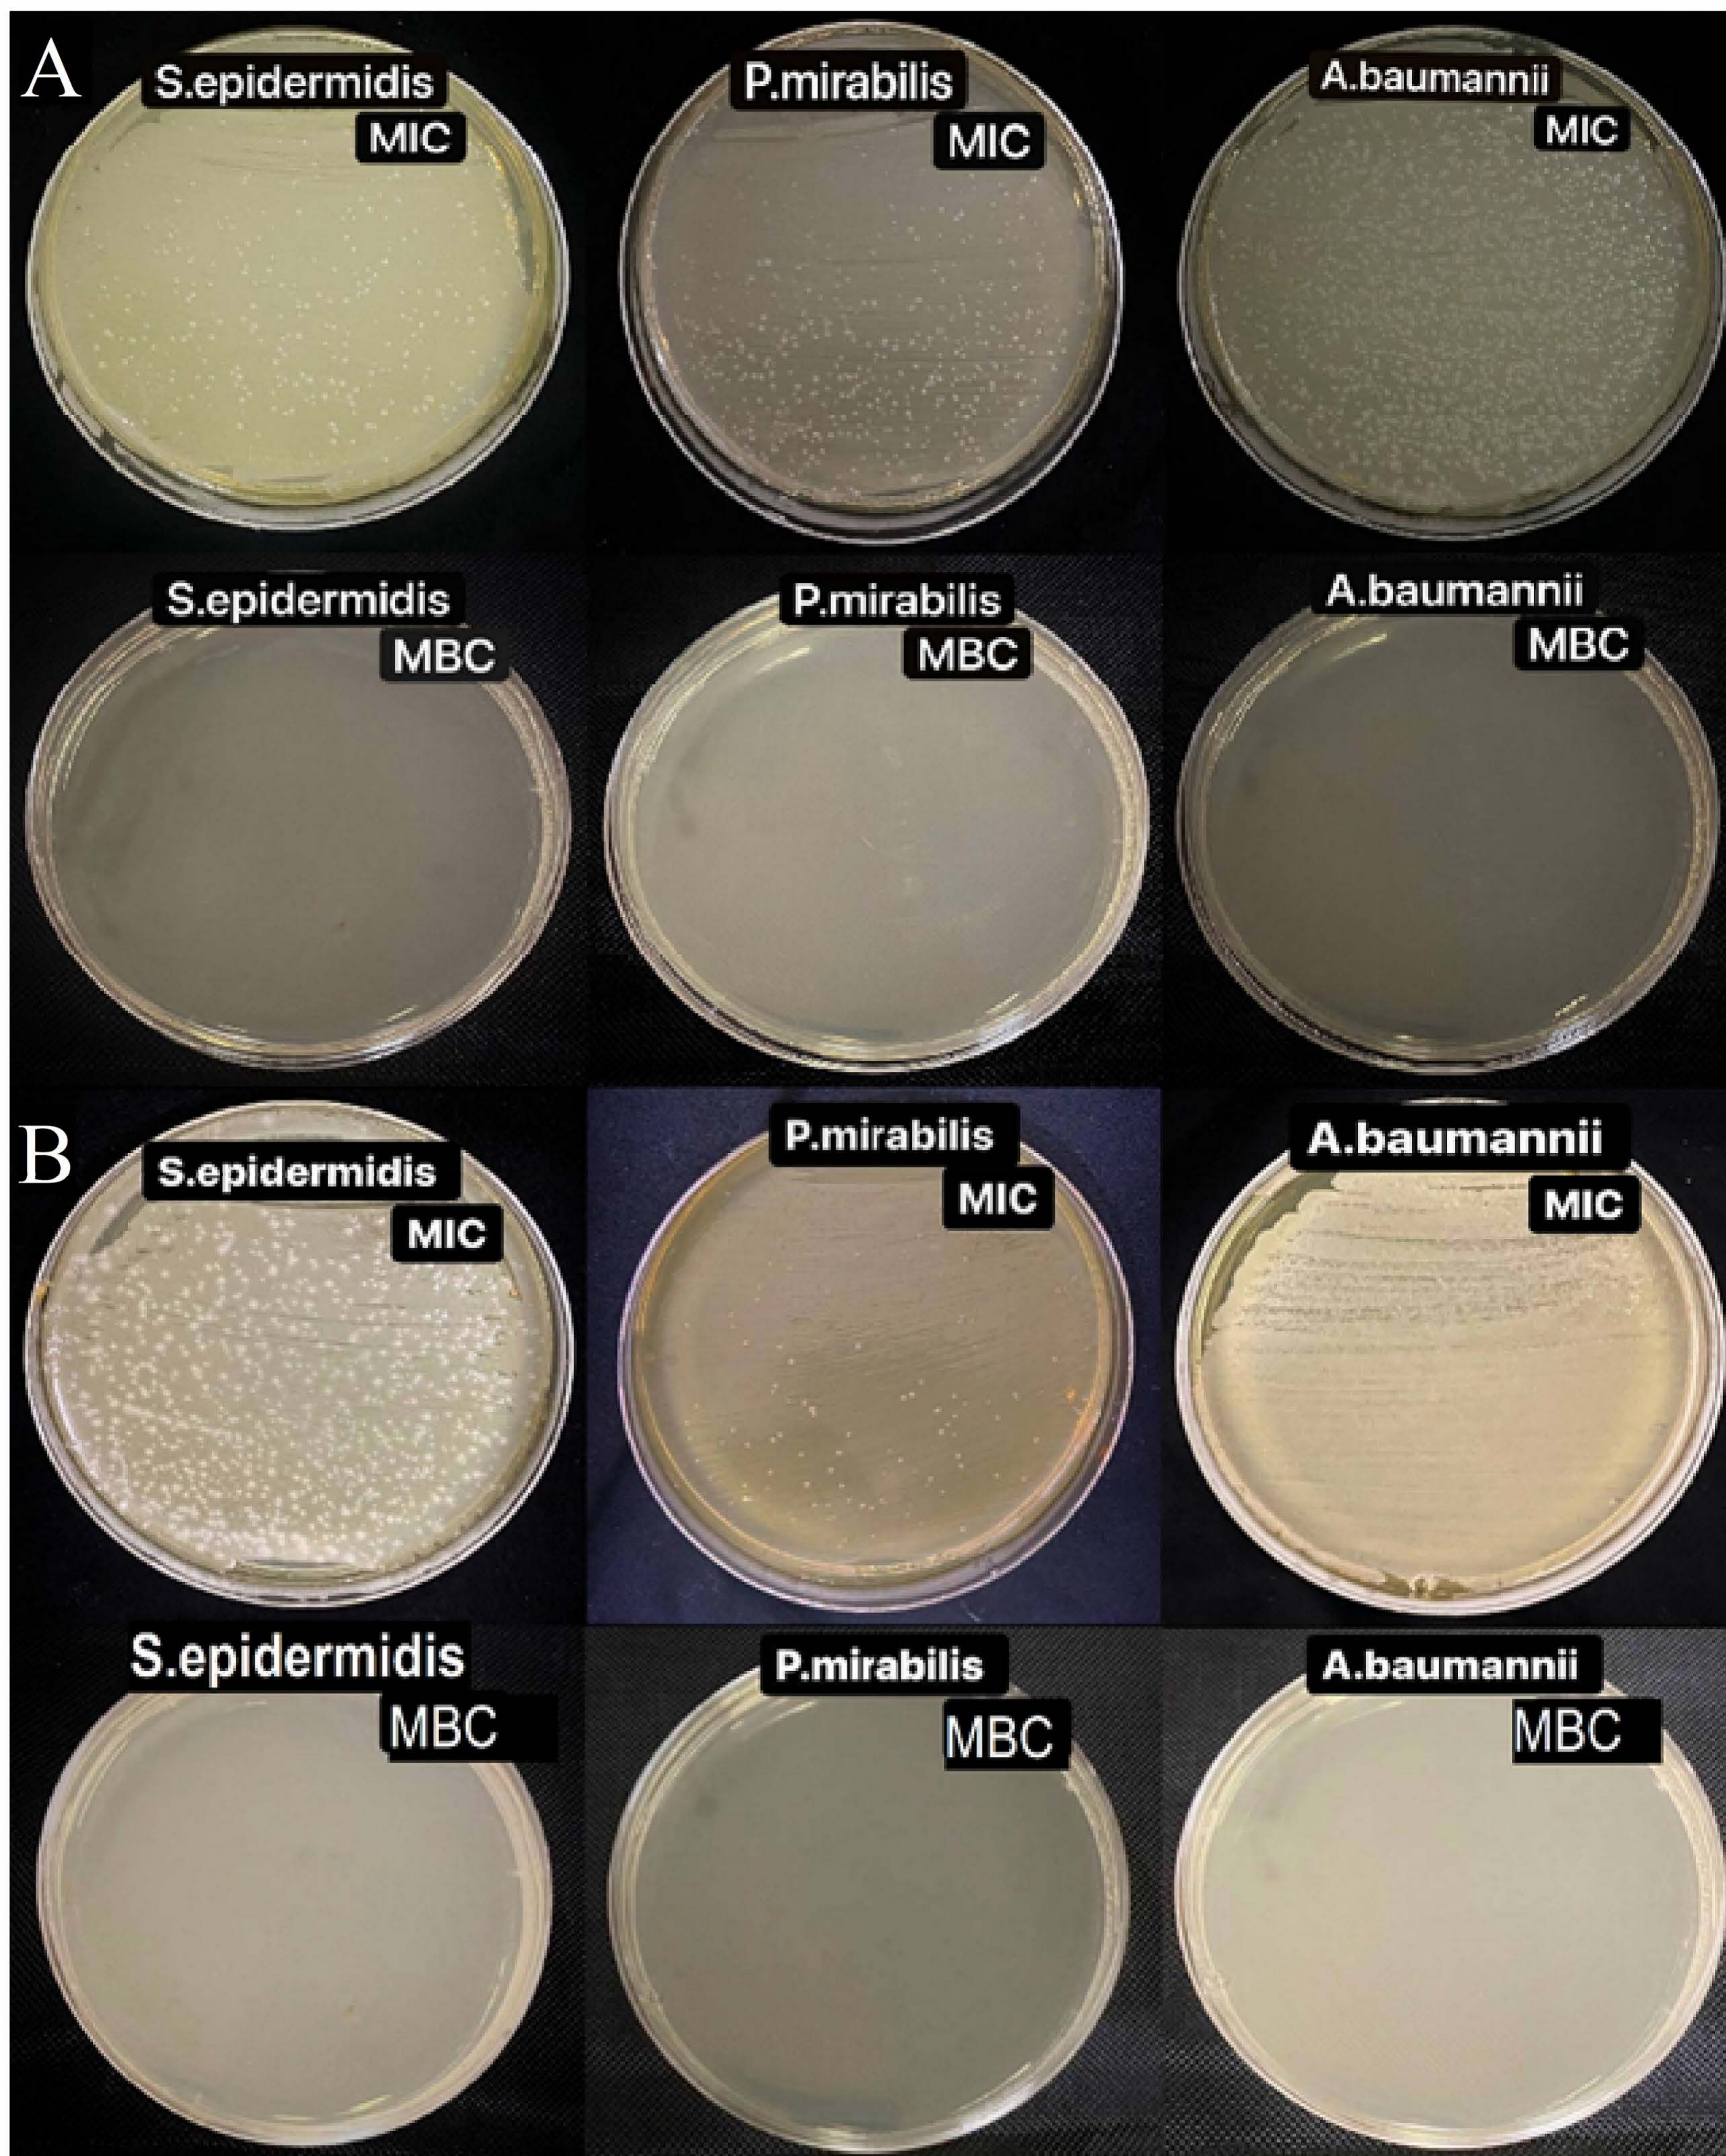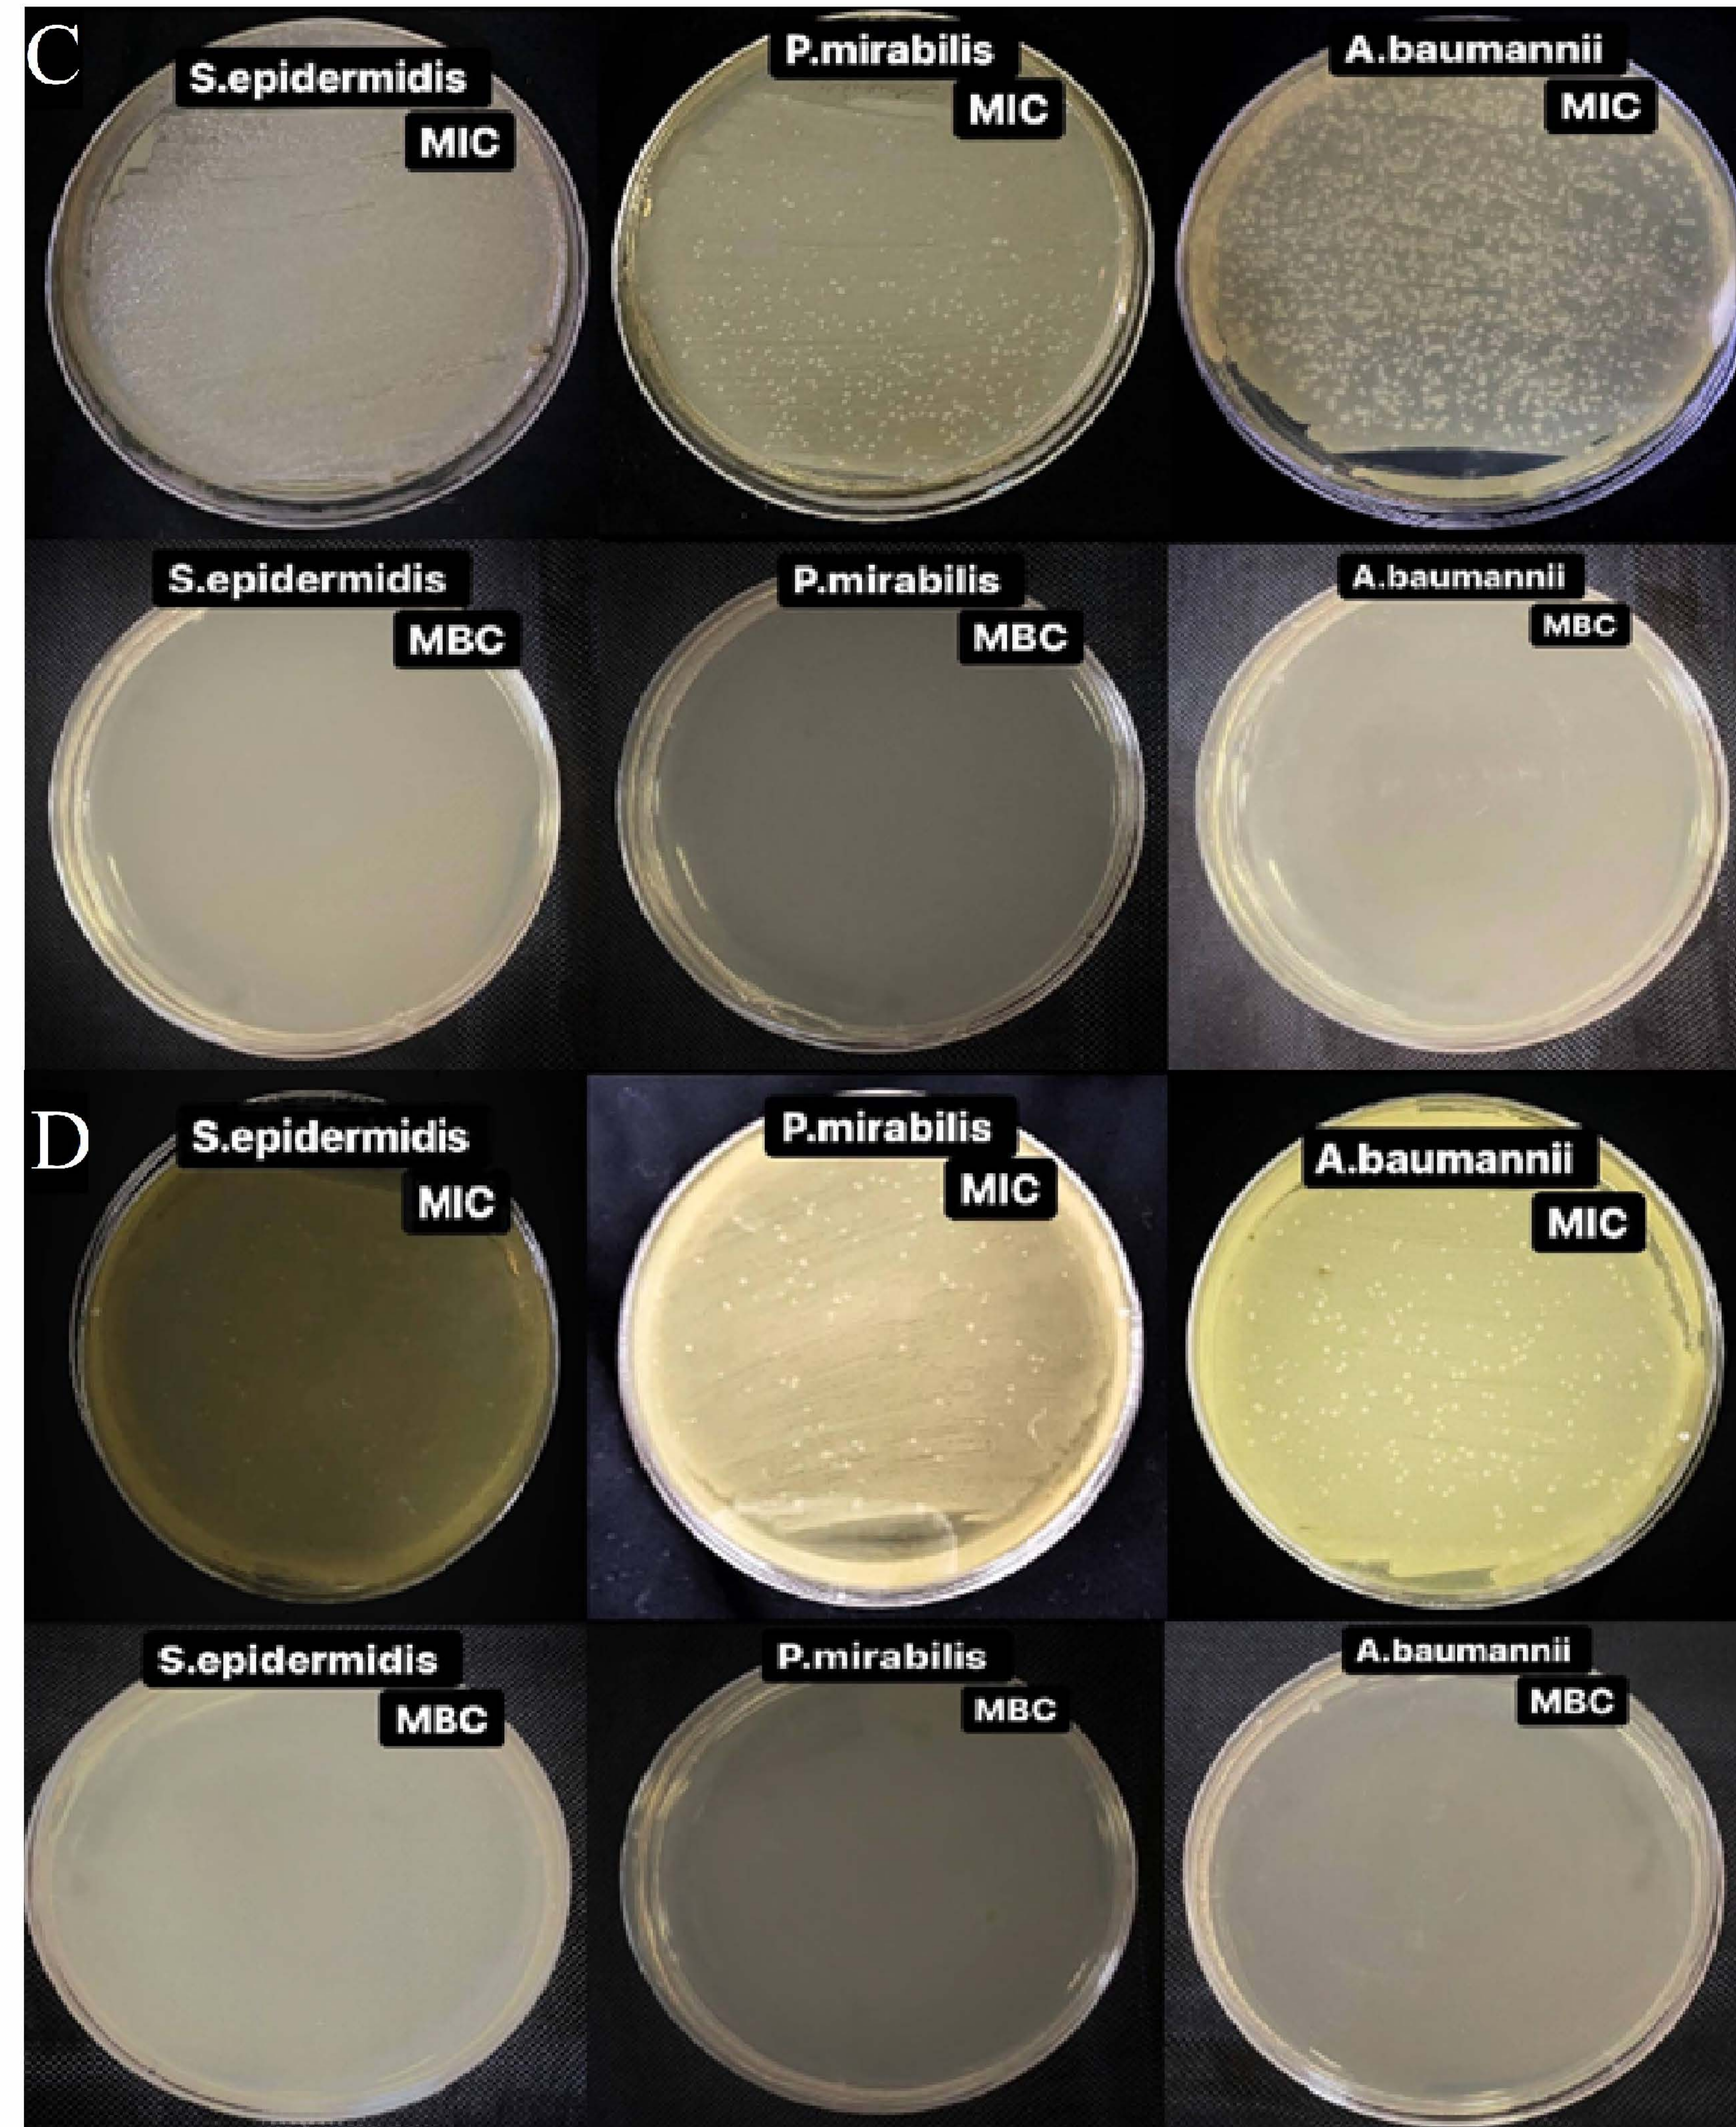

Supplementary Figure S1

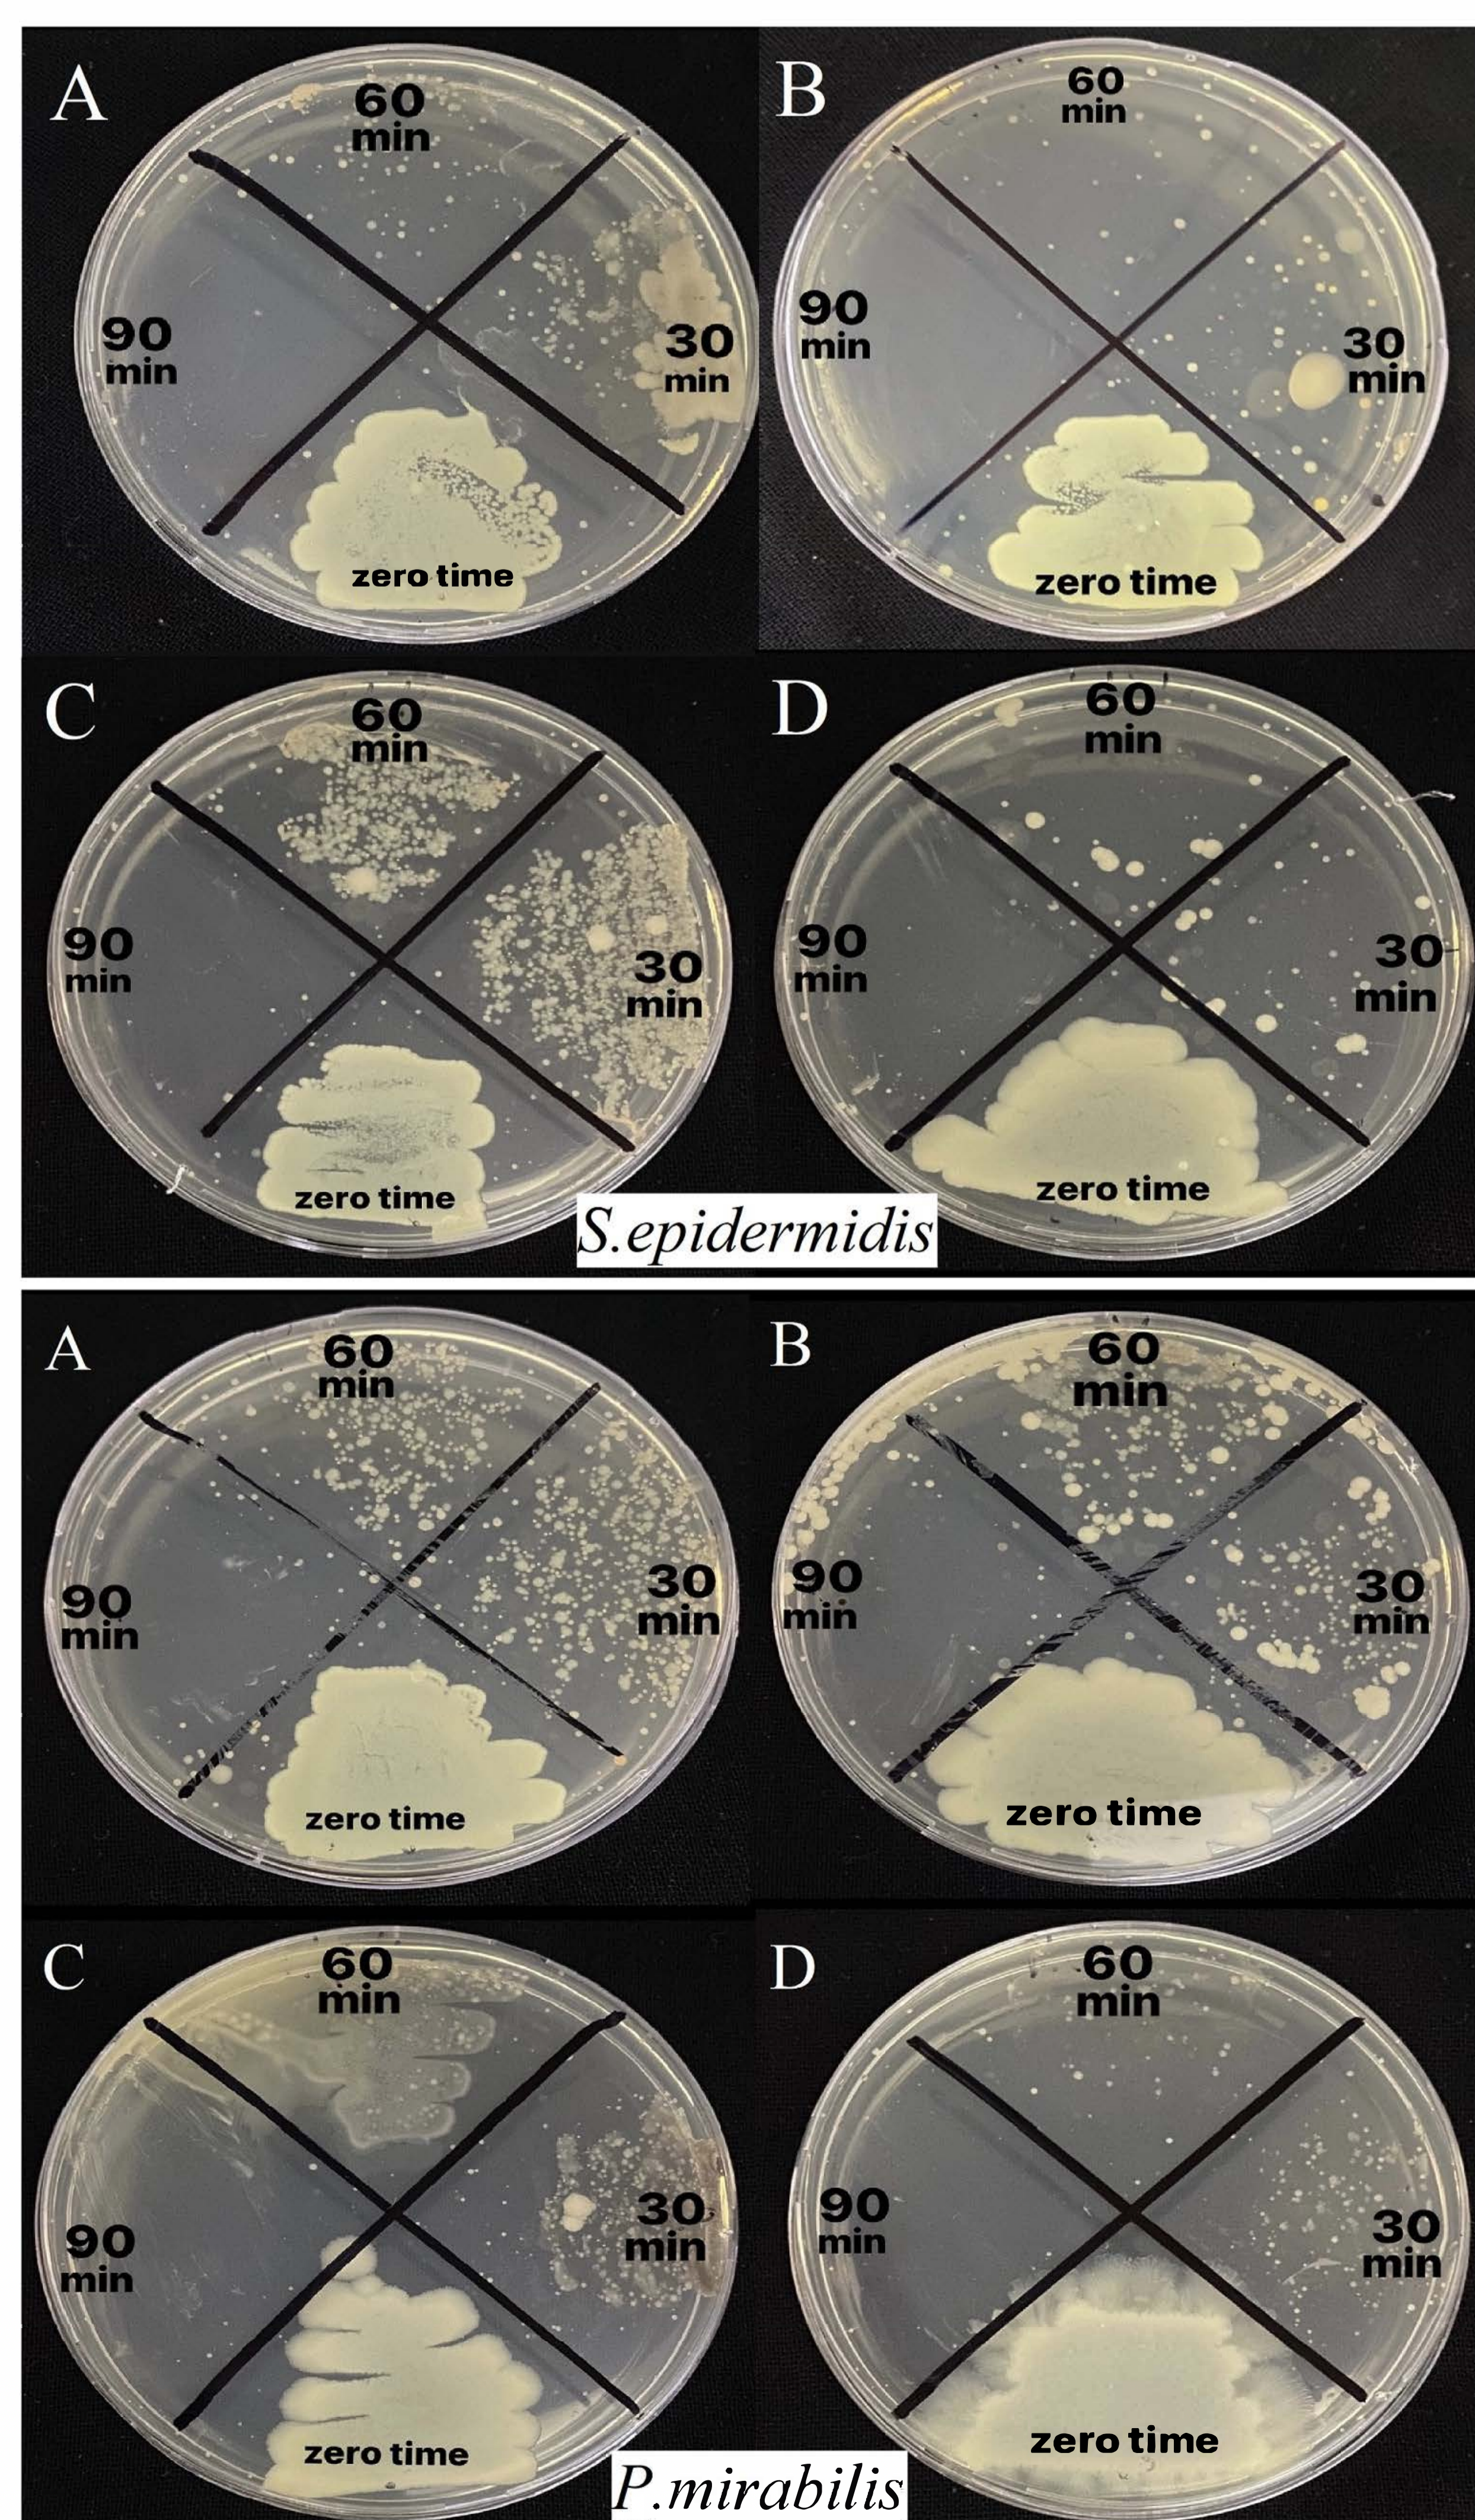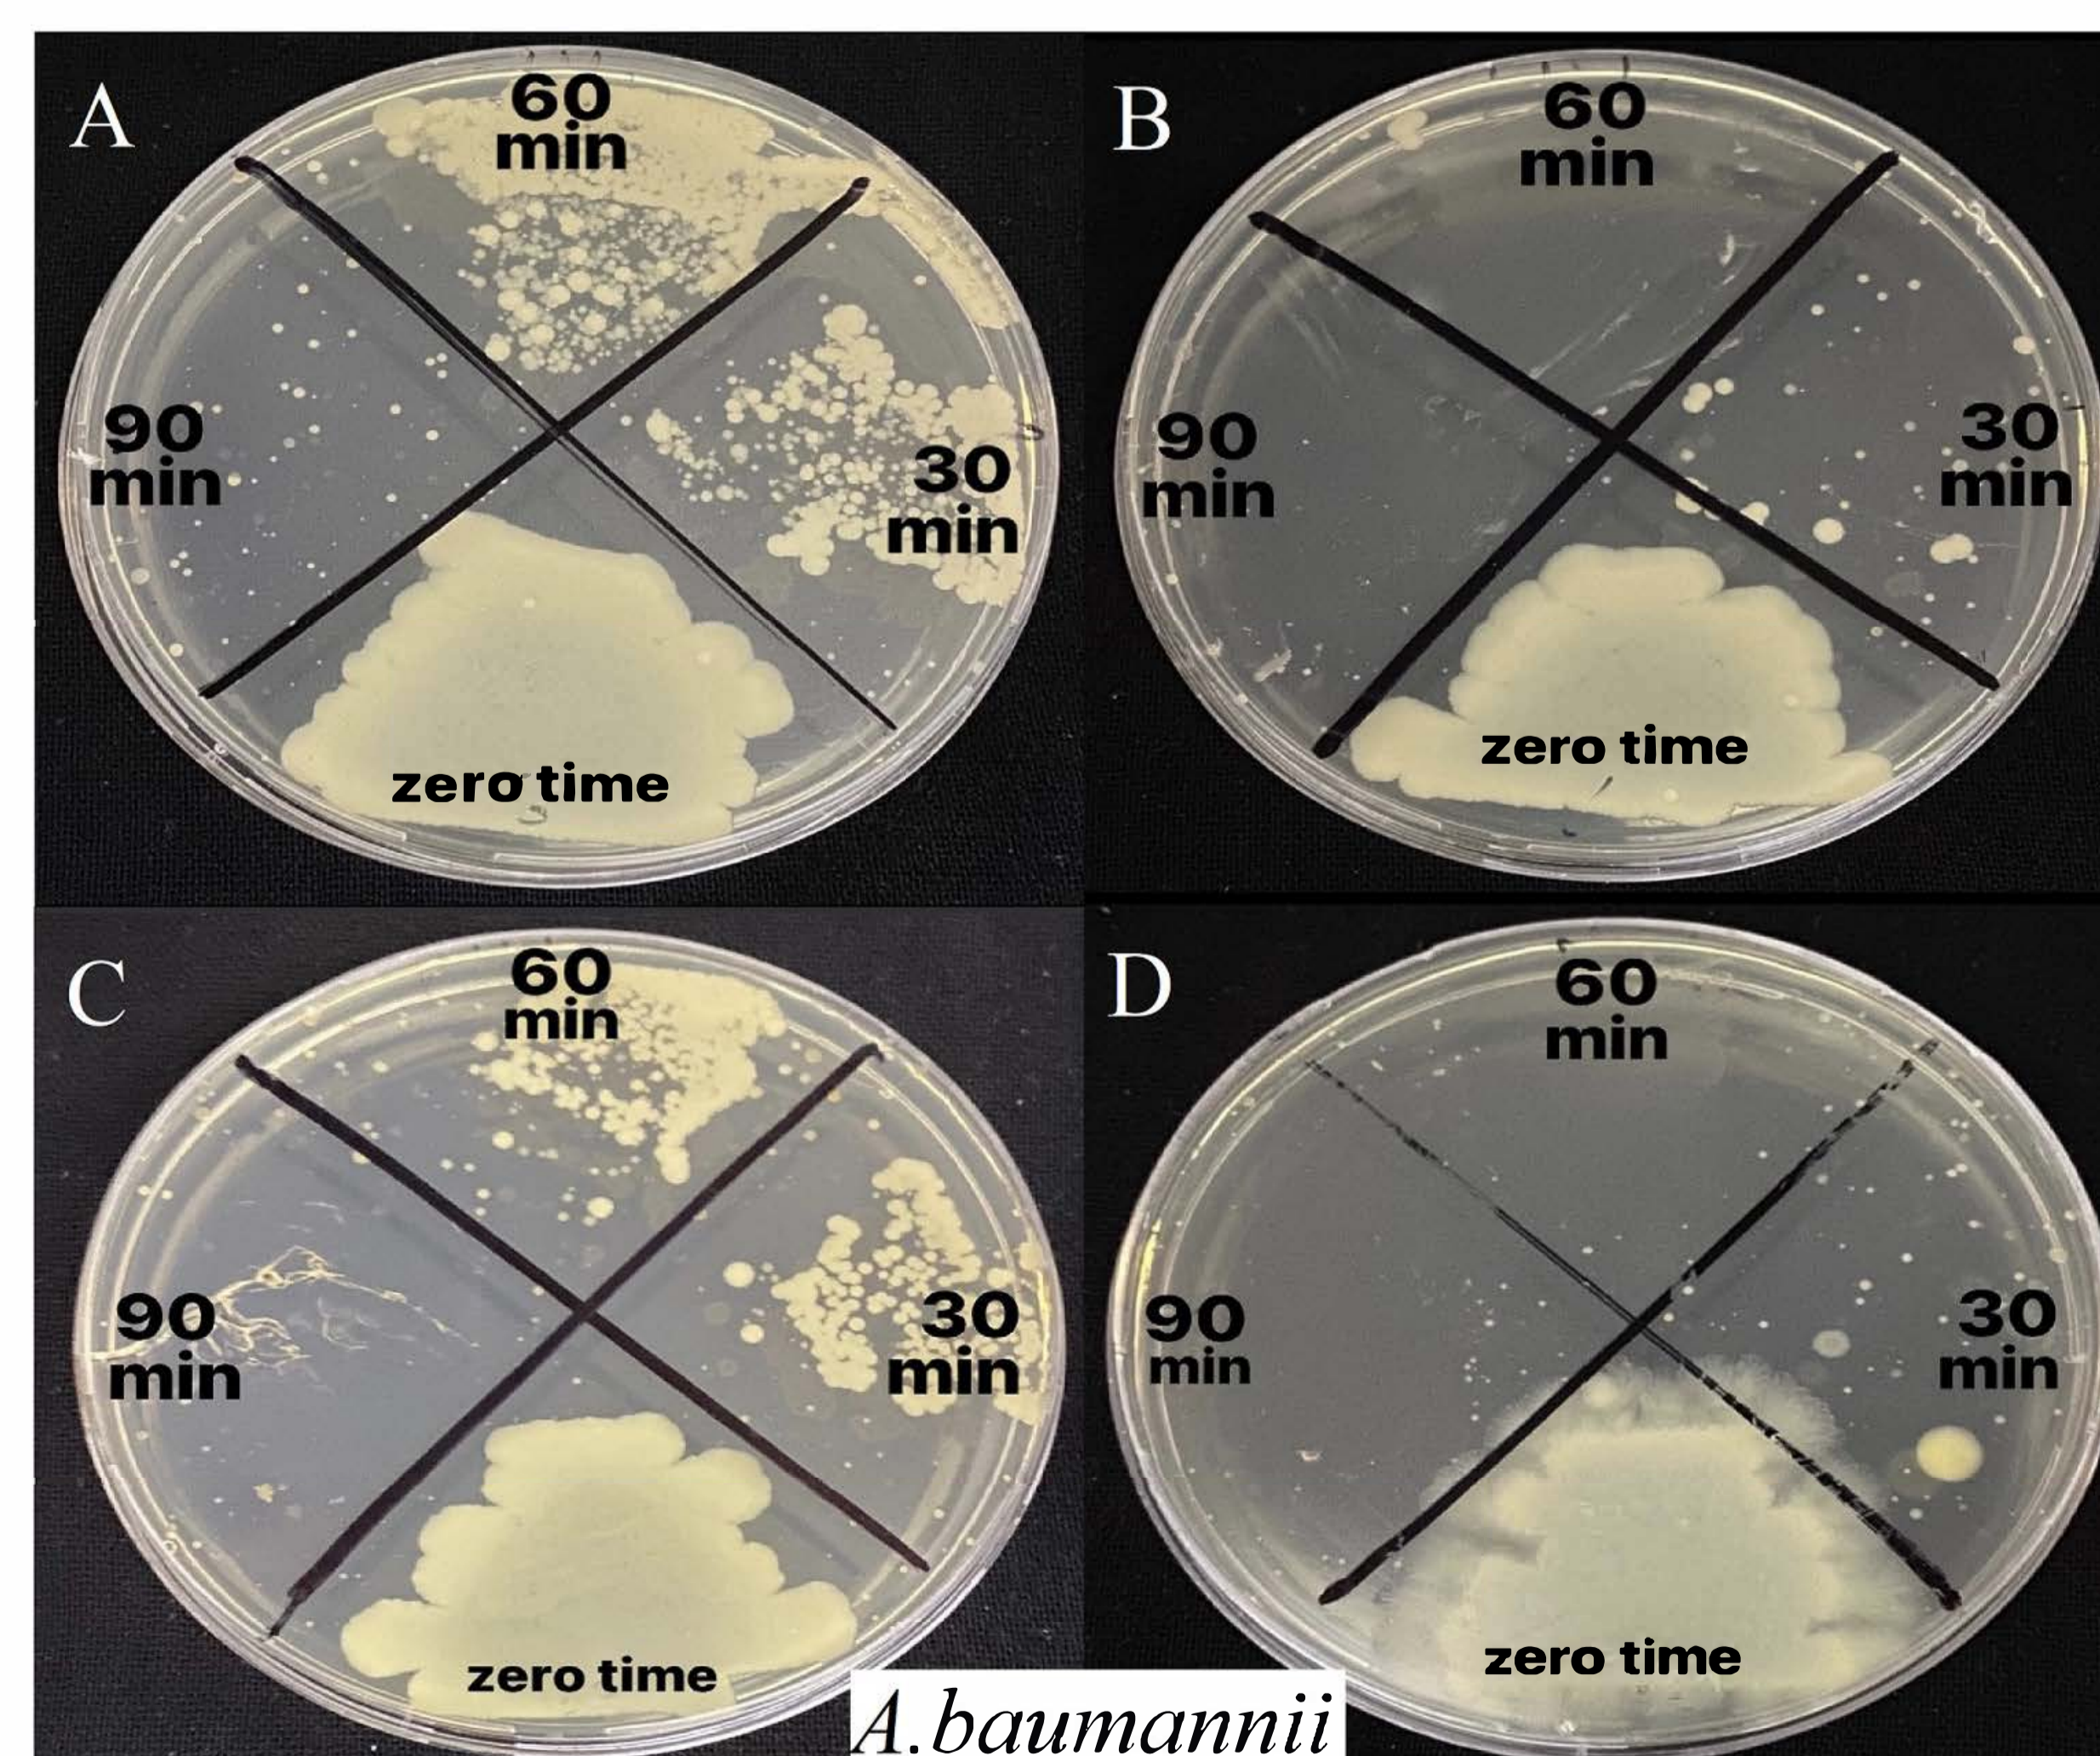

Supplementary Figure S2

Supplement: s1 [file s1]
